# Supplementary material for: Ink4a/Arf -Dependent Loss of Parietal Cells Induced by Oxidative Stress Promotes CD44-Dependent Gastric Tumorigenesis
Source: Oxford University Press journal article supplement (doi:10.1158/1940-6207.capr-15-0025-t), 2015-03-27
Supplement: 19406207capr150025t-sup-144373_1_supp_2898744_nlc3m3.doc [file 19406207capr150025t-sup-144373_1_supp_2898744_nlc3m3.doc]

**SUPPLEMENTAL METHODS**

**Ascorbic Acid Treatment in Vivo**

*K19-Wnt1/C2mE* mice were orally administered ascorbic acid (Sigma-Aldrich, St. Louis, MO) at a dose of 30 mg/kg per day dissolved in drinking water from 12 to 30 weeks of age. Mice were monitored daily for signs of stress. Any abnormal behavior was not observed during the experimental period.

**Ionizing Irradiation**

Wild-type mice at 7 weeks of age were exposed to 10 Gy of ionizing radiation with use of an x-irradiator (MBR-1520R-3; Hitachi Medical Corporation, Tokyo, Japan) at settings of 150 kV and 20 mA. Tissue was dissected for immunofluorescence analysis at 5 days after irradiation.

**Immunoblot Analysis**

Immunoblot analysis was performedas described previously (1) with primary antibodies including those to p38MAPK (Cell Signaling Technology, Boston, MA), to phospho-p38MAPK (Cell Signaling Technology), to p16INK4a (Abcam, Cambridge, UK), to p19ARF (Abcam), and to -actin (Santa Cruz Biotechnology, Santa Cruz, CA), each at a 1/1000 dilution.

**Histology and Immunohistochemistry**

Tissue was fixed in 4% paraformaldehyde, embedded in paraffin, and sectioned at a thickness of 4 m. Sections were depleted of paraffin and then rehydrated in a graded series of ethanol solutions. For histology, sections were stained with hematoxylin-eosin. For immunohistochemistry, sections were washed with PBS, subjected to antigen retrieval by heating for 10 min at 100°C in 0.01 M sodium citrate (pH 6.0), and exposed to 3% H2O2 before incubation with primary antibodies. Immune complexes were detected with the use of a Vectastain Elite Kit (Vector Laboratories, Burlingame, CA) and 3,3ʹ-diaminobenzidine, and the sections were counterstained with hematoxylin.

**Immunofluorescence Analysis**

Tissue was processed as for immunohistochemistry, with the exception that sections were not exposed to H2O2. For detection of immune complexes, sections were incubated with appropriate Alexa Fluor 488– or Alexa Fluor 594–conjugated secondary antibodies (Invitrogen, Tokyo, Japan) diluted in PBS, washed three times with PBS, mounted in Vectashield mounting medium (Vector Laboratories), and viewed and photographed with a Biorevo BZ-9000 fluorescence microscope (Keyence). Additional primary antibodies included rabbit polyclonal antibodies to p19ARF (diluted 1:100; Abcam), rabbit monoclonal antibodies to phospho-p38MAPK (diluted 1:100; Cell Signaling Technology), rabbit monoclonal antibodies to Ki-67 (diluted 1:100; Abcam), and rat monoclonal antibody to CD44v8-10 (diluted 1:100) (1).

**Flow Cytometric Analysis of Intracellular ROS Levels**

Dissociated lineage marker–negative (CD45−, TER119−, CD31−), propidium iodide− (nonapoptotic) SPEM cells were sorted with the use of a FACSAria Cell Sorter (BD Biosciences, Tokyo, Japan) on the basis of reactivity with mouse monoclonal antibodies to H+,K+-ATPase (diluted 1:50; Thermo Scientific, Waltham, MA). For initial sorting, the cells were incubated for 30 min at 4°C with fluorescein isothiocyanate–conjugated antibodies to CD45, to TER119, and to CD31 (eBioscience, San Diego, CA).

**Isolation of Single Cells from SPEM of *K19-Wnt1 ⁄C2mE* Mice**

SPEM located adjacent to gastric tumors was surgically dissected from 30-week-old *K19-Wnt1⁄C2mE* mice and digested for 6 h at 37°C in Ham’s F12 medium supplemented with collagenase (300 U/ml) and hyaluronidase (100 U/ml). The digested tissue was then subjected to vigorous mixing, and red blood cells were lysed with NH4Cl at room temperature. A single-cell suspension was obtained by repeated passage of remaining tissue fragments for 2 min through a pipette tip in Accumax solution containing DNase I (0.1 mg/ml) followed by filtration of the mixture through a 40-m nylon mesh. All reagents for cell isolation were obtained from Stemcell Technologies (Vancouver, Canada).

**Gastric Organ Culture**

Gastric tissue was excised and placed in Dulbecco’s modified Eagle’s medium (DMEM) at 37°C. After removal of connective tissue, the remaining tissue was transferred to 35-mm round culture dishes containing 2 ml of DMEM supplemented with 10% FBS, penicillin (100 U/ml), and streptomycin (100 g/ml) and was incubated under 5% CO2 at 37°C for 6 h in the absence or presence of 500 M H2O2, ascorbic acid (50 g/ml), and 10 M SB203580 (Wako, Tokyo, Japan). The tissue was then processed for immunofluorescence analysis as described above.

**Quantitative RT-PCR analysis**

Total RNA was extracted from gastric glandular epithelium using RNeasy Mini Kit (QIAGEN, Tokyo, Japan), and was subjected to RT-PCR with specific primers, and those specific for GAPDH were used as an internal control. Quantitative RT-PCR was carried out using the Thermal Cycler Dice Real Time System (Takara Bio, Tokyo, Japan). The PCR conditions were as follows: 95°C for 2 min, and 40 cycles at 95°C for 30 s, 60°C for 30 s, followed by dissociation-curve analysis to confirm specificity. Data are presented as means ± SD of triplicates. Primer sets for RT-PCR were: TFF2 forward, 5’-AGGTCCAGTGGAGCAGACAT-3’ and reverse, 5’-TCGGCAGTAGCAACTCTCAG -3’; GAPDH forward, 5’-GTGAAGGTCGGTGTGAACG-3’ and reverse, 5’-GACCATGTAGTTGAGGTCAATG-3’.

**Gastric Unit Isolation and Gastric Organoid Culture**

Gastric gland units were isolated from the corpus region of the mouse stomach near the squamocolumnar junction as previously described (2), but with some modifications. In brief, the stomach was opened along the line of greater curvature and washed with saline, the muscular layer was removed, and the remaining epithelium was minced with scissors into 5-mm square pieces, which were then incubated for 1 h at 4°C in Dulbecco’s PBS supplemented with 10 mM EDTA. The tissue fragments were then vigorously suspended in the same solution without EDTA with the use of a 10-ml pipette, and the resulting suspension was centrifuged at 300 *g* for 5 min at 4°C to yield a pellet enriched in gastric glands. The isolated glands were passed through a 70-m mesh and then mixed with 25 l of Matrigel (BD Biosciences) per original 5-mm piece of gastric tissue and plated in a 48-well plate. After polymerization of the Matrigel, each gel was overlaid with 250 l of gastric culture medium consisting of Advanced DMEM/F12 supplemented with B27 and *N*-acetylcysteine (Invitrogen) as well as with 10 nM gastrin (Sigma-Aldrich), epidermal growth factor (EGF, 50 ng/ml; Peprotech, Rockey Hill, NJ), fibroblast growth factor 10 (FGF10, 100 ng/ml; Peprotech), Noggin (100 ng/ml; Peprotech), R-spondin1 (200 ng/ml; Peprotech), and Wnt3a (30 ng/ml; Wako). For immunofluorescence analysis, gastric organoids were cultured in glass bottom plates, and were fixed in 4% paraformaldehyde after culture for 4 days and processed for immunofluorescence analysis as described above.

**References**

1. Ishimoto T, Nagano O, Yae T, et al. CD44 variant regulates redox status in

cancer cells by stabilizing the xCT subunit of system xc(-) and thereby promotes

tumor growth. Cancer Cell 2011;19:387-400.

2. Bjerknes M, Cheng H. Multipotential stem cells in adult mouse gastric epithelium. Am J Physiol Gastrointest Liver Physiol 2002;283:G767-777.

**SUPPLEMENTARY FIGURE LEGEND:**

**Supplemental Figure 1:** Immunohistochemical staining for H+,K+-ATPase in the serial section of the gastric mucosa of tamoxifen-treated WT mouse analyzed as in Fig. 3F. Arrowheads show the remaining parietal cells after tamoxifen treatment. Scale bars, 100 m.
